# Supplementary material for: Novel heterozygous variants of SLC12A6 in Japanese families with Charcot–Marie–Tooth disease
Source: PubMed Central journal article supplement — Ann Clin Transl Neurol. 2022 Jun 22;9(7):902–11. doi: 10.1002/acn3.51603 (PMC9268887; doi:10.1002/acn3.51603), 2022-06-22
Supplement: ACN3-9-902-s004.pdf [file ACN3-9-902-s004.pdf]

(A) Family 8 c.1739C>A, p.Thr580Lys Family 9 c.1939T>C, p.Ser647Pro (C)

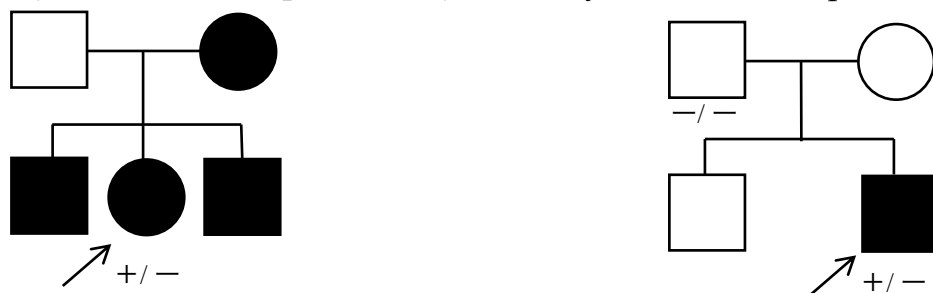

(B)

|              | 580 |   |   |   |   |
|--------------|-----|---|---|---|---|
| KCC3-SLC12A6 | S   | F | F | S | T |
| KCC1-SLC12A4 | S   | F | F | S | T |
| KCC2-SLC12A5 | S   | F | F | S | T |
| KCC4-SLC12A7 | S   | F | F | S | T |

|   | 647 |   |   |   |  |
|---|-----|---|---|---|--|
| L | S   | M | F | F |  |
| L | S   | M | F | F |  |
| L | S   | M | F | F |  |
| L | S   | M | F | F |  |

|               | 580 |   |   |   |   |
|---------------|-----|---|---|---|---|
| SLC12A6_Human | S   | F | F | S | T |
| SLC12A6_Mouse | S   | F | F | S | T |
| SLC12A6_Cat   | S   | F | F | S | T |
| SLC12A6_Dog   | S   | F | F | S | T |
| SLC12A6_Cow   | S   | F | F | S | T |
| SLC12A6_Frog  | S   | F | F | S | T |

|   | 647 |   |   |   |  |
|---|-----|---|---|---|--|
| L | S   | M | F | F |  |
| L | S   | M | F | F |  |
| L | S   | M | F | F |  |
| L | S   | M | F | F |  |
| L | S   | M | F | F |  |
| L | S   | M | F | F |  |

(D)

| Nucleotide change          | c.1739C>A                           |                        | c.1939T>C     |                        |               |
|----------------------------|-------------------------------------|------------------------|---------------|------------------------|---------------|
| Amino Acid change          | p.Thr580Lys                         |                        | p.Ser647Pro   |                        |               |
| Zygoty                     | Heterozygous                        |                        | Heterozygous  |                        |               |
| Allele frequency-gnomAD    | 0                                   |                        | 0             |                        |               |
| Allele frequency-jMorp     | 0                                   |                        | 0             |                        |               |
| Our control                | -                                   |                        | -             |                        |               |
| SIFT/Prediction            | 0                                   | Damaging               | 0             | Damaging               |               |
| PROVEAN/Prediction         | -4.57                               | Deleterious            | -3.9          | Deleterious            |               |
| Polyphen2/Prediction       | 0.998                               | Damaging               | 1             | Damaging               |               |
| MutationAssesor/Prediction | 4.025                               | Damaging               | 4.27          | Damaging               |               |
| FATHMM/Prediction          | -5.25                               | Damaging               | -5.12         | Damaging               |               |
| Condel/prediction          | 0.73                                | Damaging               | 0.746         | Damaging               |               |
| Dynamut                    | $\Delta\Delta G$ /Prediction        | -0.269kcal/mol         | Destabilizing | -0.403kcal/mol         | Destabilizing |
|                            | $\Delta\Delta G$ (ENCOM)/Prediction | -0.02kcal/mol          | Destabilizing | -0.134kcal/mol         | Destabilizing |
| iMutant                    | RI/Stability                        | 5                      | Decrease      | 5                      | Decrease      |
| ACMG                       | Population Data                     | PS4_Supporting PM2     |               | PS4_Supporting PM2     |               |
|                            | In silico Data                      | PP3                    |               | PP3                    |               |
|                            | De novo Data                        |                        |               |                        |               |
|                            | Other Data                          |                        |               |                        |               |
|                            | Criteria                            | Uncertain Significance |               | Uncertain Significance |               |

|                        | This report   |             |
|------------------------|---------------|-------------|
|                        | Family 7      | Family 8    |
| Mutation               | c.1739C>A     | c.1939T>C   |
|                        | p.Thr580Lys   | p.Ser647Pro |
| Ethnicity              | Japanese      | Japanese    |
| Onset age              | 38            | 3           |
| Exam age               | 63            | 37          |
| Genotype               | AD            | Sporadic    |
| Distal weakness        | +             | +           |
| Distal atrophy         | +             | +           |
| distal leg MMT         | 3             | 0-1         |
| Sensory disturbance    | +             | +           |
| DTR                    | Absent        | Absent      |
| Cognitive impairment   | —             | —           |
| Other symptom          | CK335         | —           |
| Median CMAP (mV)       | 7.94          | NE          |
| Median MNCV (m/s)      | 50.6          | NE          |
| Median SNAP ( $\mu$ V) | 3.4           | NE          |
| Median SCV (m/s)       | 18.5          | NE          |
| Tibial CMAP (mV)       | 5.8           | NE          |
| Tibial MNCV (m/s)      | 34.4          | NE          |
| Sural SNAP ( $\mu$ V)  | NE            | NE          |
| Sural SCV (m/s)        | NE            | NE          |
| Brain MRI              | leukoaraiosis | NA          |

(E)

| CMTNS parameter/Pt   | Family 7 | Family 8 |
|----------------------|----------|----------|
| Sensory symptoms     | NA       | 3        |
| Motor symptoms legs  | NA       | 4        |
| Motor symptoms arms  | NA       | NA       |
| Pinprick sensibility | NA       | 3        |
| Vibration            | NA       | NA       |
| Strength legs        | 4        | 4        |
| Strength arms        | 4        | 4        |
| Ulnar CMAP           | 0        | 3        |
| Ulnar SNAP           | 3        | 4        |
