# Supplementary figures and images for: Novel heterozygous variants of SLC12A6 in Japanese families with Charcot–Marie–Tooth disease
Source: PubMed Central journal article supplement — Ann Clin Transl Neurol. 2022 Jun 22;9(7):902–11. doi: 10.1002/acn3.51603 (PMC9268887; doi:10.1002/acn3.51603), 2022-06-22

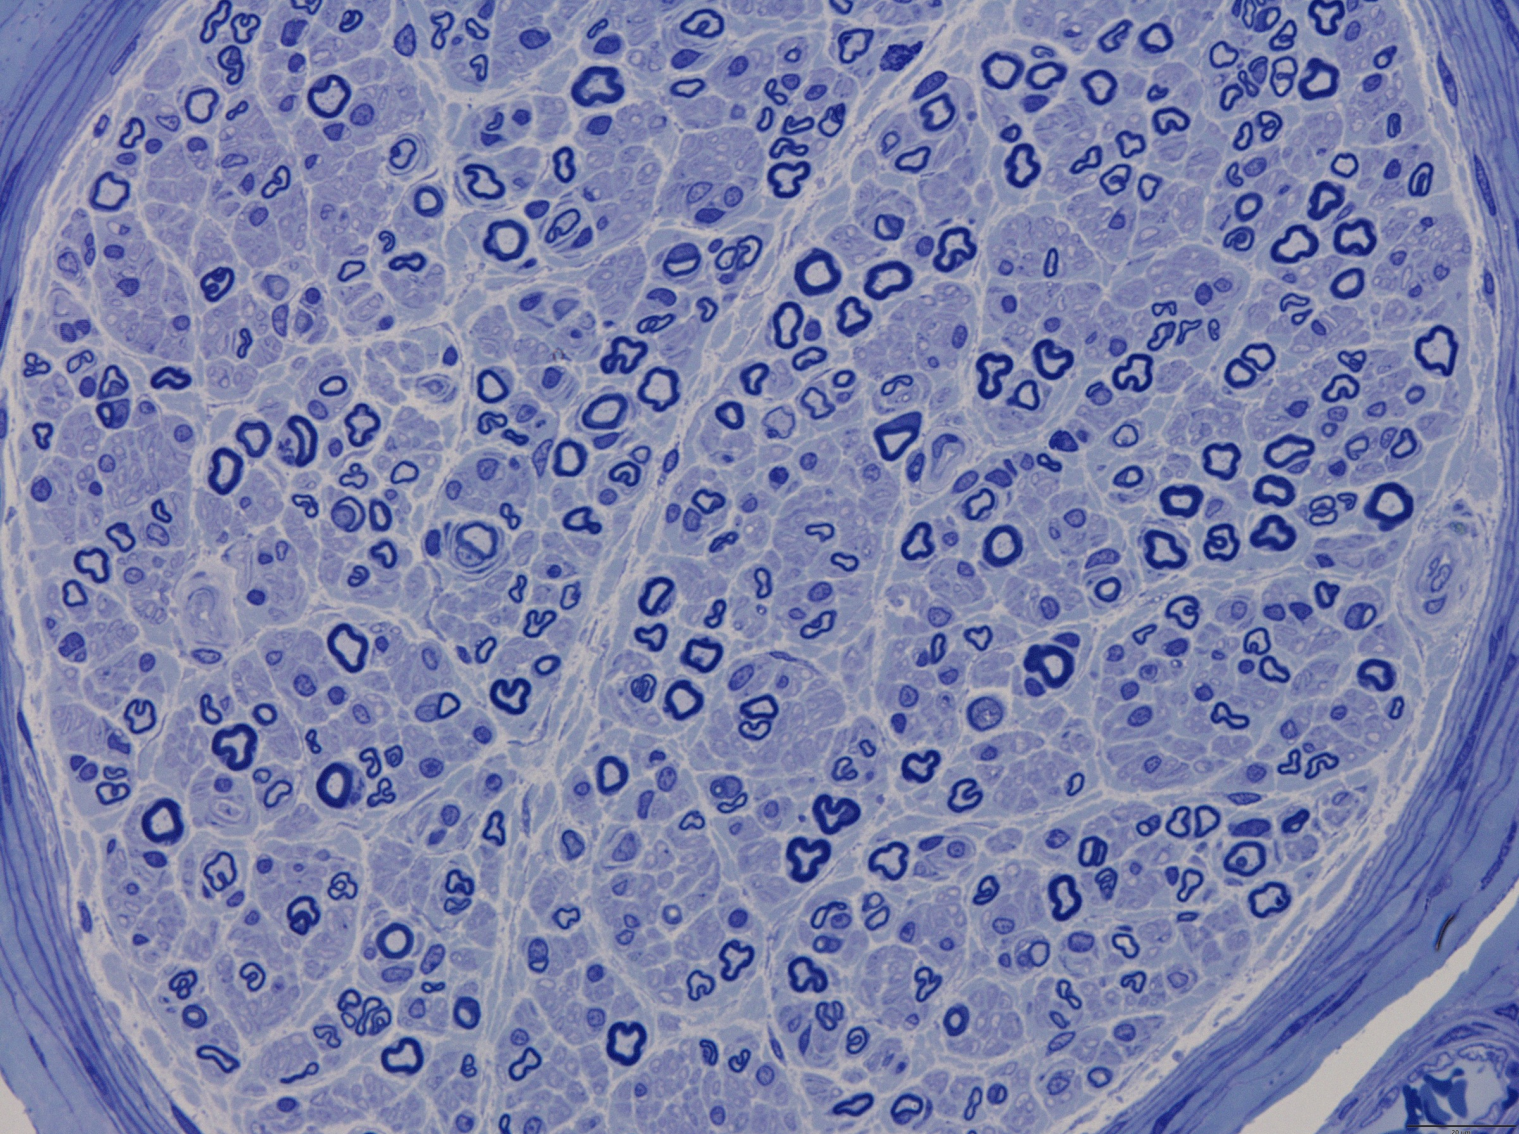

Supplement: ACN3-9-902-s001.pdf [file ACN3-9-902-s001.pdf]
